# Supplementary material for: Genomic Regions Associated with Variation in Pigmentation Loss in Saddle Tan Beagles
Source: MDPI journal article supplement (doi:10.3390/genes12020316), 2021-02-23

# Nord & Jensen: Genomic regions associated with variation in fur coloration in saddle tan beagles

Supplementary material: Representative pictures of dogs  
with different colour phenotypes.

# Face

| Score | Name                 | Description                                                                                                              |
|-------|----------------------|--------------------------------------------------------------------------------------------------------------------------|
| 1     | No or residual white | Solid coloured face with no, or only, residual white around the nose                                                     |
| 2     | White muzzle         | White markings around the nose, partly or completely extending over the muzzle, blaze not reaching to or above eye level |
| 3     | Blaze                | As described above but also including a blaze reaching to or above eye level                                             |

1

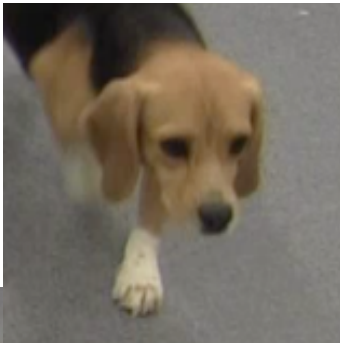

2

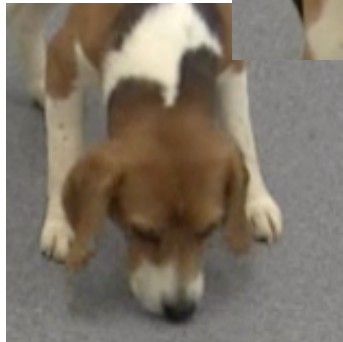

3

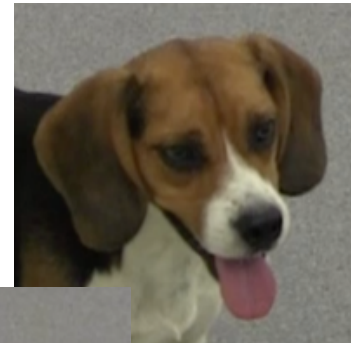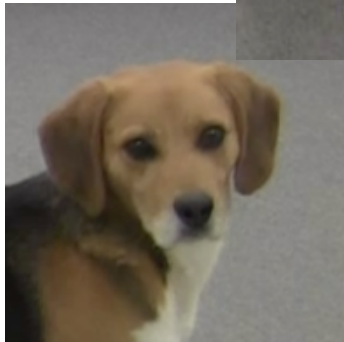

# Neck

| Score | Name           | Description                                                                                                     |
|-------|----------------|-----------------------------------------------------------------------------------------------------------------|
| 1     | No white       | Except for the ventral side, solid coloured neck                                                                |
| 2     | Residual white | Except for the ventral side, small residual white patches or thin stripes around the neck.                      |
| 3     | Collar         | The white on the ventral side of the neck extends as a collar towards or around the dorsal side. Large patches. |

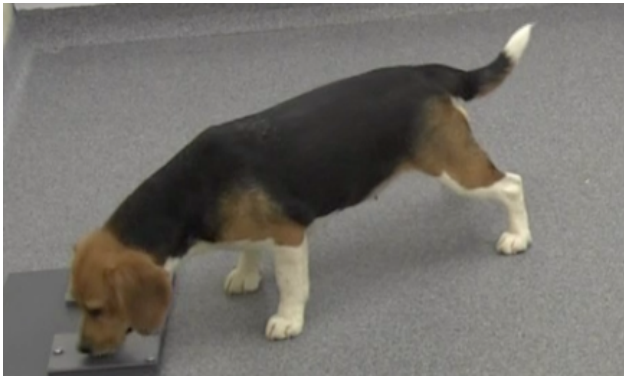

1

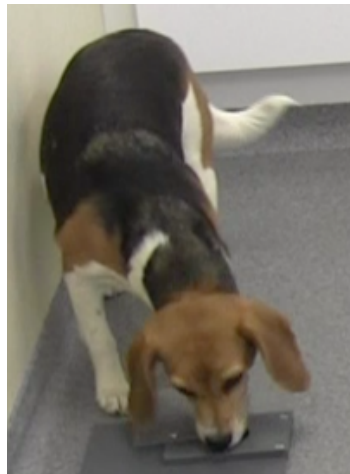

2

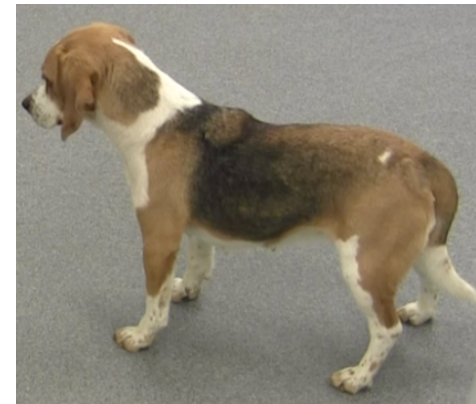

3

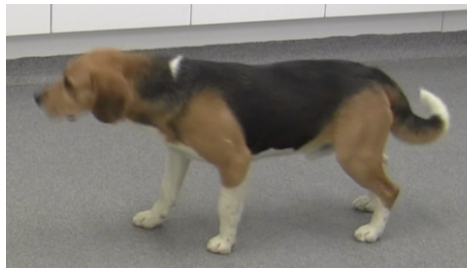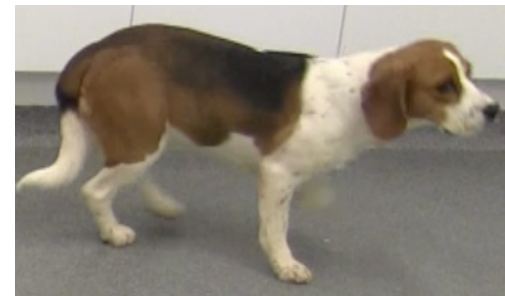

# Tail

| Score | Name         | Description                                 |
|-------|--------------|---------------------------------------------|
| 1     | Little white | 25% or less white tail                      |
| 2     | Half white   | About half of the tail is white, >25%, <75% |
| 3     | Mostly white | 75% or more white tail                      |

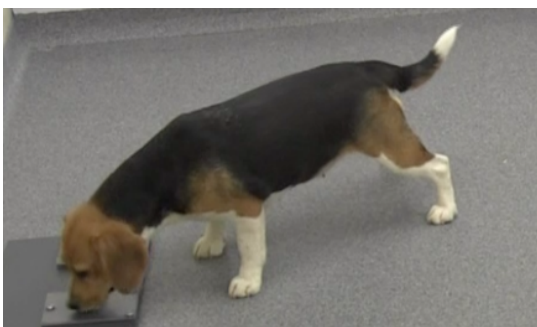

1

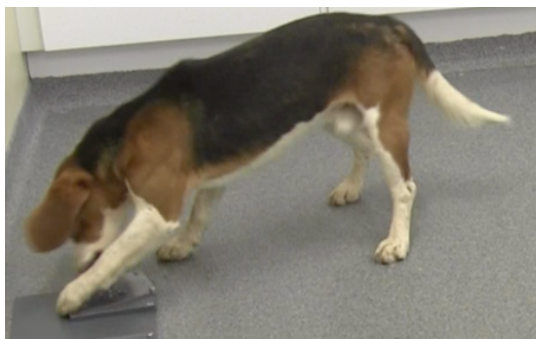

2

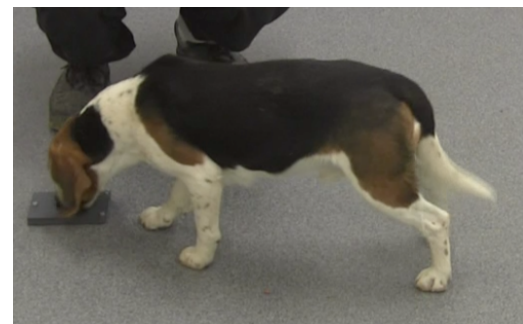

3

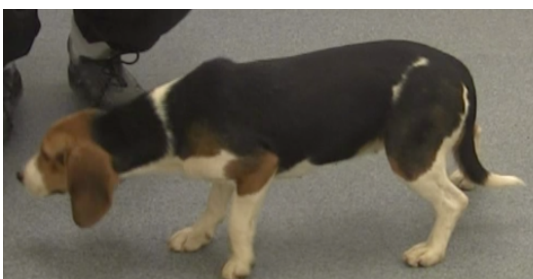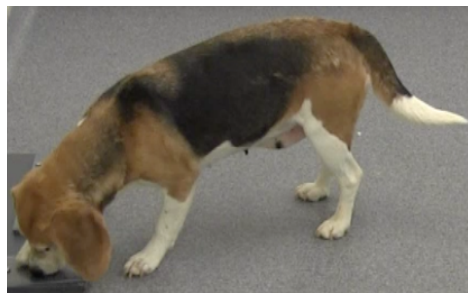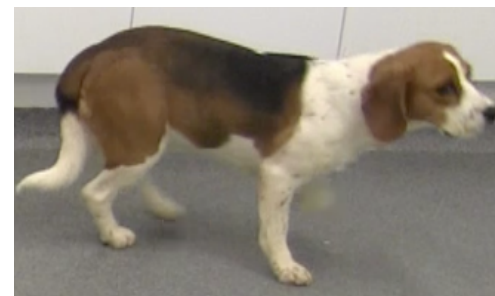

# Legs

| Score | Name             | Description                                                                                        |
|-------|------------------|----------------------------------------------------------------------------------------------------|
| 1     | Half covered     | At least 3 legs <60% white                                                                         |
| 2     | Mostly covered   | At least 3 legs >60%<100% white                                                                    |
| 3     | Completely white | At least 3 legs 100% white and the white extends from the leg on to the body from at least one leg |

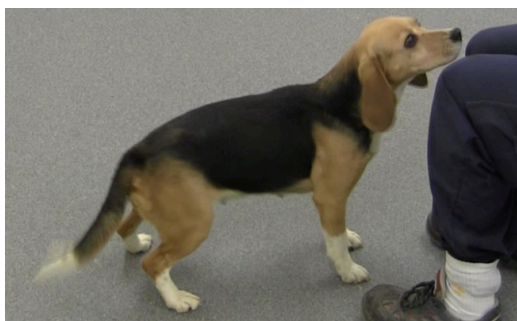

1

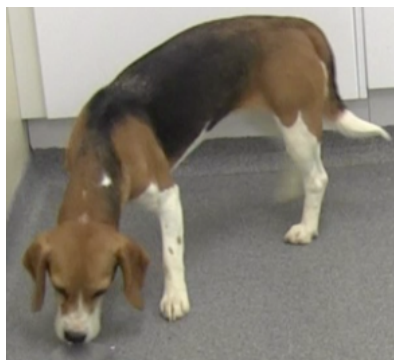

2

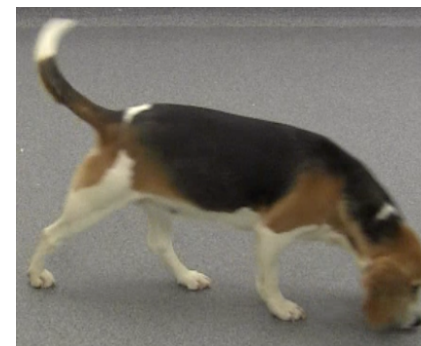

3

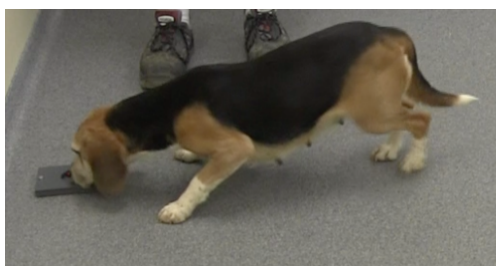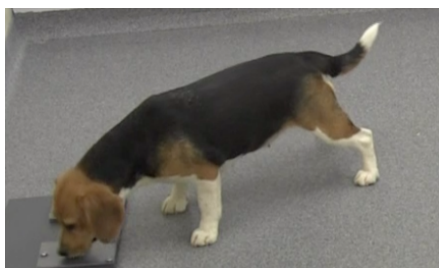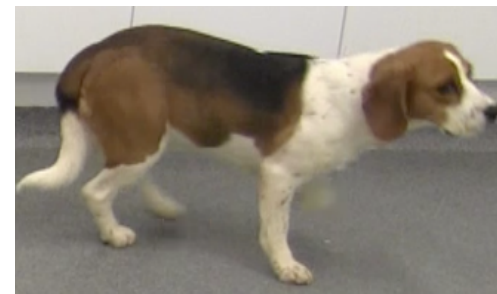



# Body

| Score | Name          | Description                                                                                                                                 |
|-------|---------------|---------------------------------------------------------------------------------------------------------------------------------------------|
| 1     | Solid         | No no or only residual white patches on the body except for the neck area and the ventral side                                              |
| 2     | Some white    | Only one or two smaller white patch/patches on the body except for the neck area and the ventral side, usually extending from the hind legs |
| 3     | White patches | Large white patches, usually on both sides of the body                                                                                      |

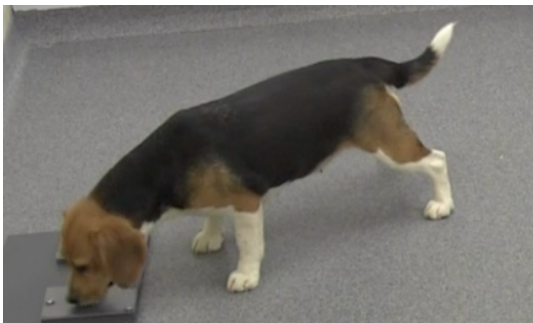

1

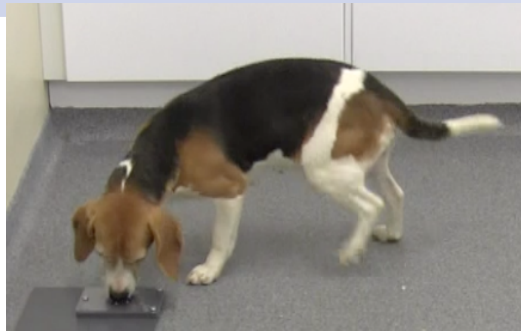

2

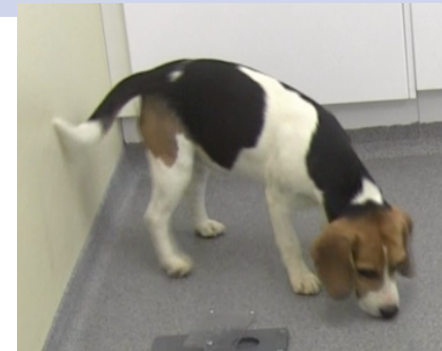

3

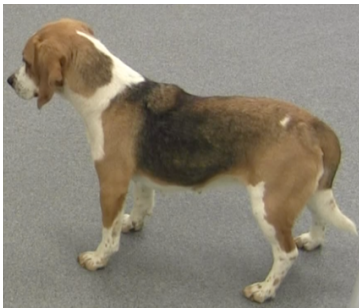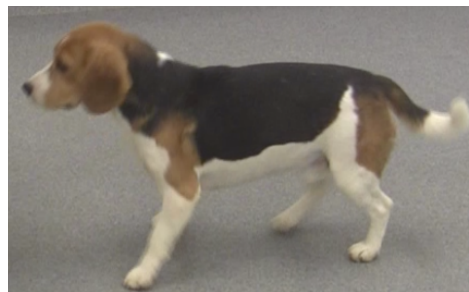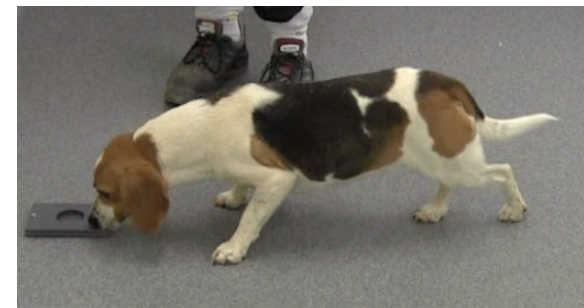

# Saddle

| Score | Name       | Description                                                                        |
|-------|------------|------------------------------------------------------------------------------------|
| 1     | Solid      | Solid black saddle from the neck to the tail base                                  |
| 2     | Semi-solid | Mostly solid black saddle from the neck to the tail base, but brown patches occurs |
| 3     | Faded      | No or mostly no solid black saddle                                                 |

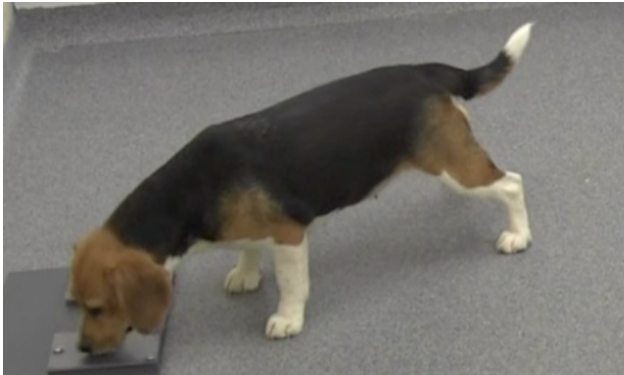

1

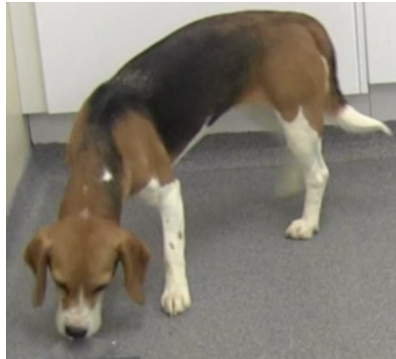

2

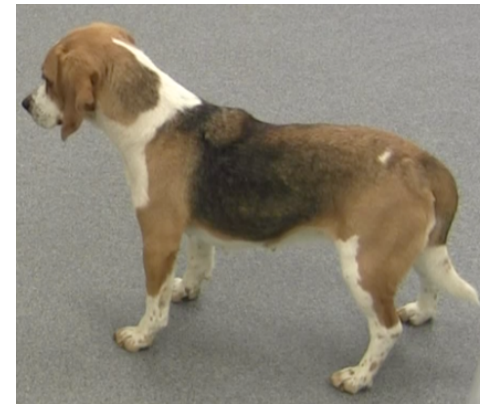

3

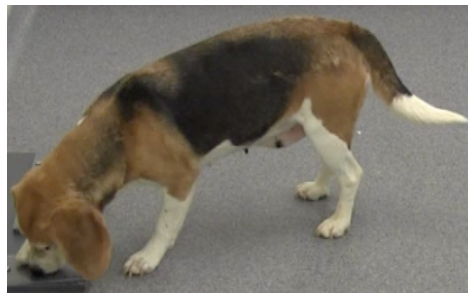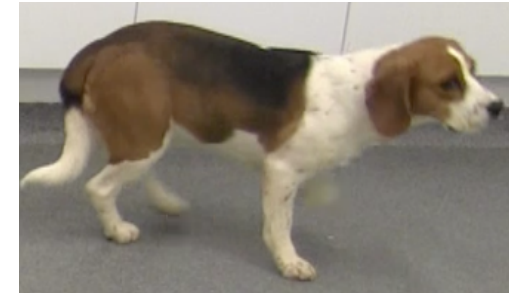

Supplement: s1 [file s1]
